# Supplementary material for: Supraglacial lake bathymetry automatically derived from ICESat-2constraining lake depth estimates from multi-source satelliteimagery
Source: Copernicus journal article supplement (doi:10.5194/tc-2021-4), 2021-01-29
Supplement: Supplementary file 1 [file tc-2021-4-supplement.pdf]

## Supplemental Tables and Figures.

### Lakes Over Sermeq Kujalleq

| <b>Designation</b>                    | <b>Max Lake Surface Area from imagery (m<sup>2</sup>)</b> | <b>ICESat-2 track length (m)</b> | <b>ICESat-2 track Max depth</b> |
|---------------------------------------|-----------------------------------------------------------|----------------------------------|---------------------------------|
| RGT 727 May 15 <sup>th</sup> , 2019   |                                                           |                                  |                                 |
| 1                                     | 160800                                                    | 2754.44                          | 3.95                            |
|                                       |                                                           |                                  |                                 |
| RGT 841 May 23 <sup>rd</sup>          |                                                           |                                  |                                 |
| 1                                     | 357900                                                    | 2398.82                          | 1.31                            |
| 2                                     | 880300                                                    | 3092.19                          | 4.50                            |
| 3                                     | 804873                                                    | 2786.51                          | 3.03                            |
| 4                                     | 880300                                                    | 3372.80                          | 4.82                            |
| 5                                     | 625127                                                    | 2608.30                          | 1.81                            |
|                                       |                                                           |                                  |                                 |
| RGT 1108 June 9 <sup>th</sup> , 2019  |                                                           |                                  |                                 |
| 1                                     | 574200                                                    | 3350.97                          | 2.99                            |
| 2                                     | 574200                                                    | 3123.05                          | 1.51                            |
| 3                                     | 596931                                                    | 3026.49                          | 2.99                            |
| 4                                     | 956190                                                    | 3360.29                          | 2.18                            |
| 5                                     | 772089                                                    | 2746.55                          | 1.95                            |
| 6                                     | 54167                                                     | 2665.72                          | 1.51                            |
| 7                                     | 987300                                                    | 3165.52                          | 3.04                            |
| 8                                     | 738000                                                    | 3172.79                          | 3.52                            |
| 9                                     | 1165500                                                   | 2691.53                          | 0.81                            |
| 10                                    | 987300                                                    | 2968.48                          | 2.42                            |
| 11                                    | 738000                                                    | 3228.69                          | 3.22                            |
|                                       |                                                           |                                  |                                 |
| RGT 1169 June 13 <sup>th</sup> , 2019 |                                                           |                                  |                                 |
| 1                                     | 158400                                                    | 2885.59                          | 1.64                            |
| 2                                     | 513200                                                    | 2455.54                          | 2.58                            |
| 3                                     | 224100                                                    | 2396.62                          | 1.33                            |
| 4                                     | 478100                                                    | 3307.89                          | 1.50                            |
| 5                                     | 904600                                                    | 2817.40                          | 4.39                            |
| 6                                     | 904600                                                    | 2720.19                          | 5.28                            |
| 7                                     | 1113500                                                   | 3698.78                          | 2.40                            |
| 8                                     | 1113500                                                   | 2401.77                          | 1.34                            |
| 9                                     | 1113500                                                   | 2612.26                          | 1.63                            |
|                                       |                                                           |                                  |                                 |

| RGT 1222 June 17 <sup>th</sup> ,<br>2019 |         |         |       |
|------------------------------------------|---------|---------|-------|
| 1                                        | 2060100 | 3134.91 | 3.62  |
| 2                                        | 48600   | 2618.15 | 1.70  |
| 3                                        | 1635300 | 4089.09 | 8.93  |
| 4                                        | 255600  | 2718.01 | 1.23  |
| 5                                        | 1635300 | 4129.21 | 10.62 |
| 6                                        | 1692900 | 2679.53 | 1.50  |
| 7                                        | 2225700 | 3181.78 | 3.89  |
| 8                                        | 1611900 | 4443.29 | 11.43 |
| 9                                        | 998574  | 2541.70 | 2.14  |
| 10                                       | 998574  | 2802.32 | 1.70  |
| 11                                       | 1025100 | 3193.46 | 2.86  |
| 12                                       | 1611900 | 4210.25 | 11.55 |
| 13                                       | 1025100 | 3860.27 | 1.59  |
| 14                                       | 4101300 | 4774.88 | 11.49 |
| 15                                       | 2060100 | 3842.27 | 3.08  |
| 16                                       | 998574  | 2562.81 | 0.35  |
| 17                                       | 4101300 | 4602.40 | 10.64 |
| 18                                       | 5656500 | 4005.92 | 6.13  |
| 19                                       | 2982600 | 2899.97 | 1.70  |

*Table 1: Lakes used in this study with maximum surface area of the lake detected from imagery and the length of the ICESat-2 pass over the lake. Lake numbers correspond to profiles shown in Supplemental Figure 3.*

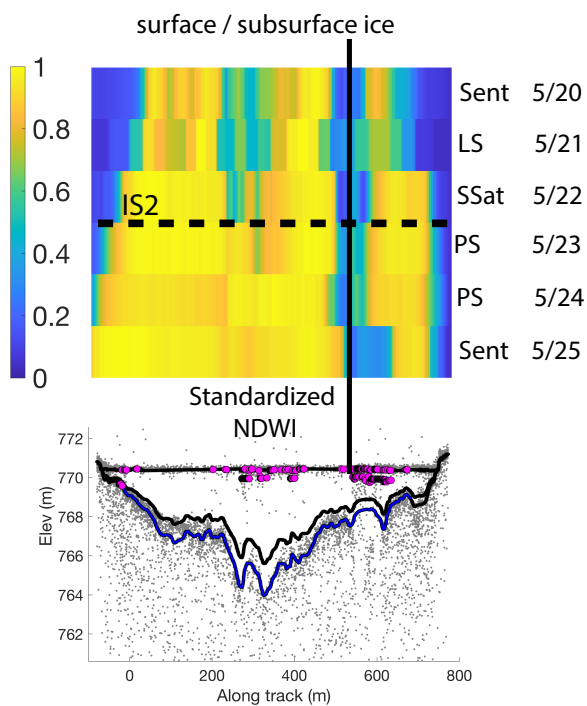

(a) Lake Amitav NDWI

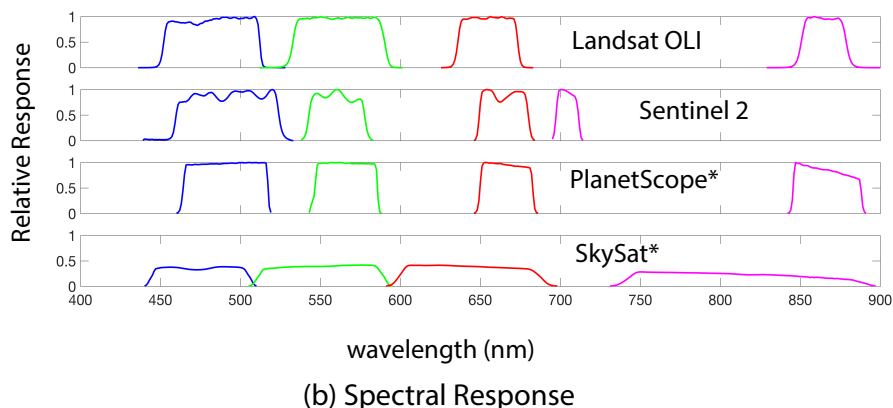

(b) Spectral Response

Figure 1: (a) Watta calculated profile of depth, depth corrected for refraction and subsurface ice over Lake Amitav (bottom) with NDWI values co-registered to the ICESat-2 track (top) (b) Spectral Response curve for imagery sources used in main text. Note that PlanetScope and SkySat data are shown for the satellite used in imagery collected over Lake Amitav and are not representative of the entire constellation. Landsat OLI source (Barsi et al., 2014), Sentinel-2 source (<https://earth.esa.int/web/sentinel/user-guides/sentinel-2-msi>), Planet Labs SkySat and PlanetScope (see: support.planet.com)

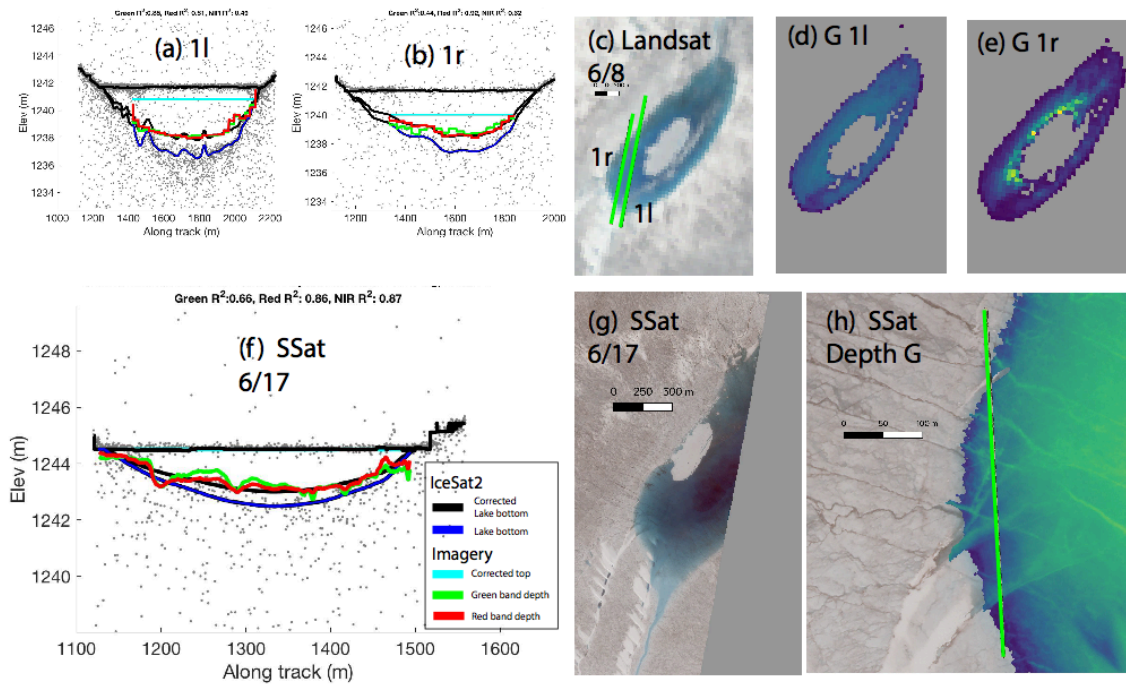

Figure S2: Watta-calculated depth, corrected depth and lake surface profiles for (top) RGT 1108 Lake 1 on June 9<sup>th</sup>, 2019, with gt1l (a,d) and gt1r (b,e). Landsat imagery collected on June 8<sup>th</sup>, 2019. (bottom) The same lake, also RGT 1222 Lake 6 on June 17<sup>th</sup>, 2019 (f-h), with SkySat imagery collected on June 17<sup>th</sup>, 2019.

Figure: S3. Lake Depth Profiles (corresponding to Table S1)

RGT 727

May 15<sup>th</sup>, 2019

Lake 1:

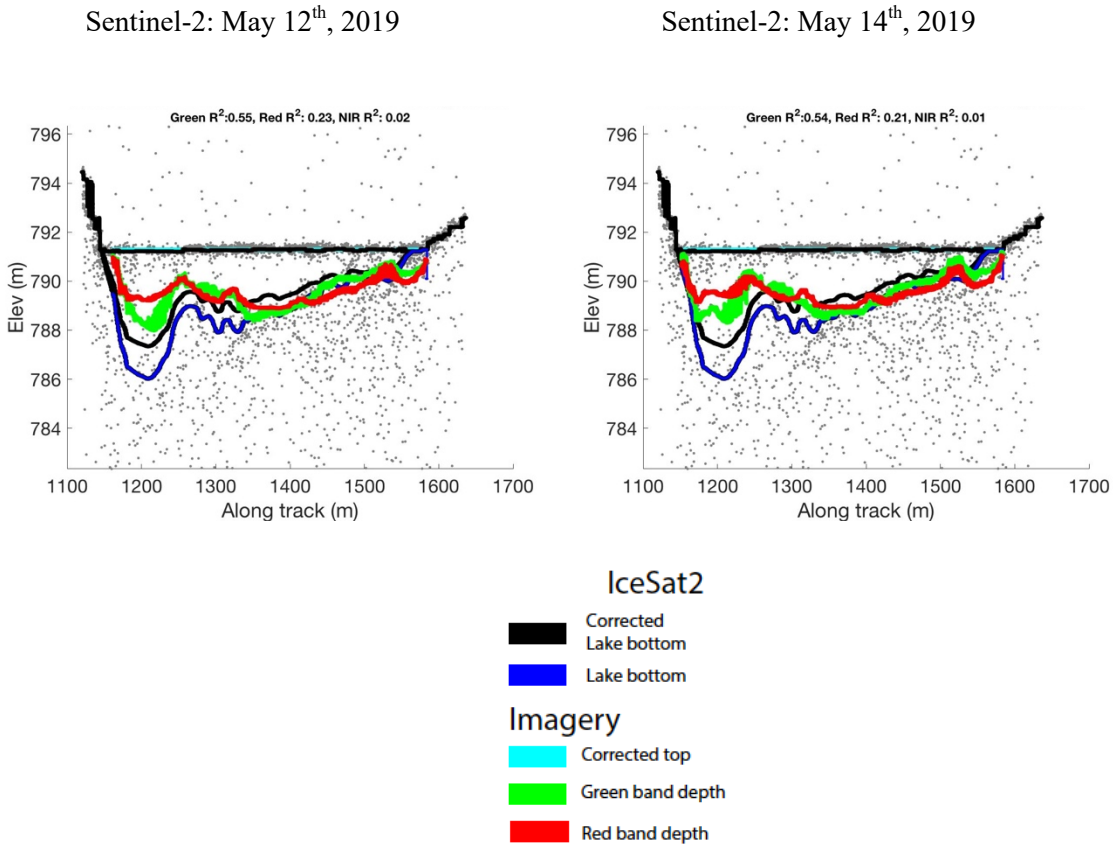

Lake 1

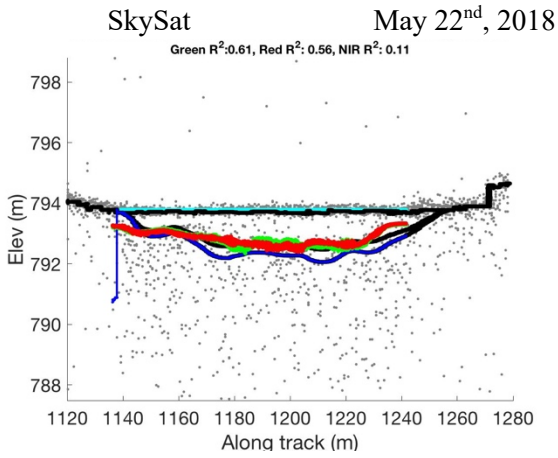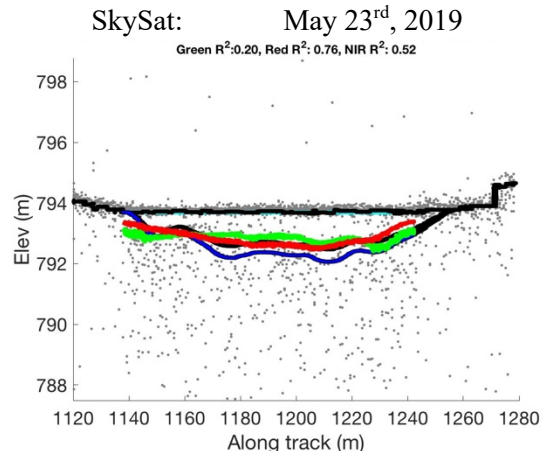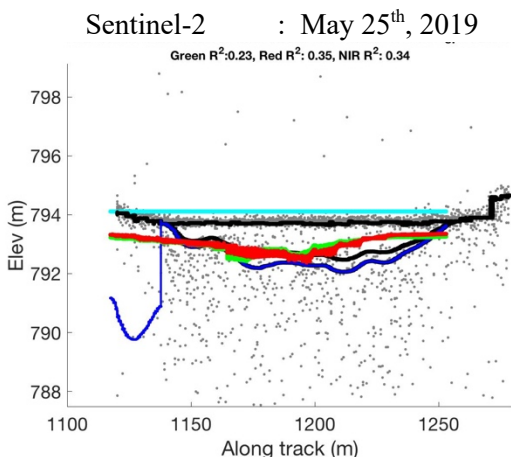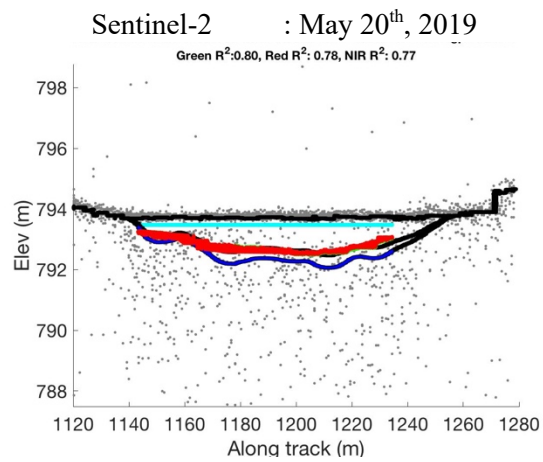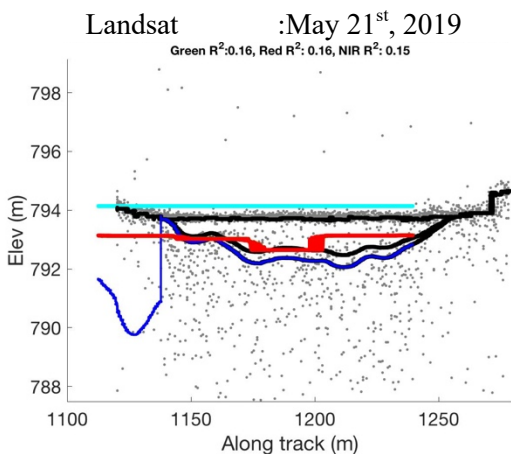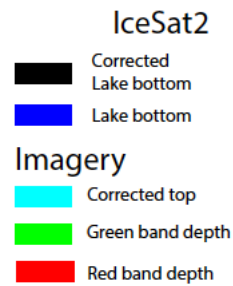

Lake 2:

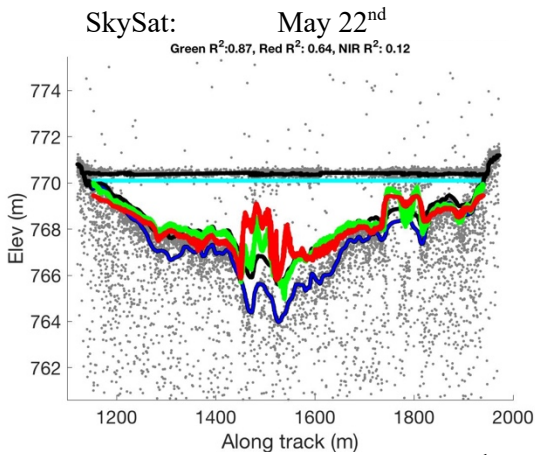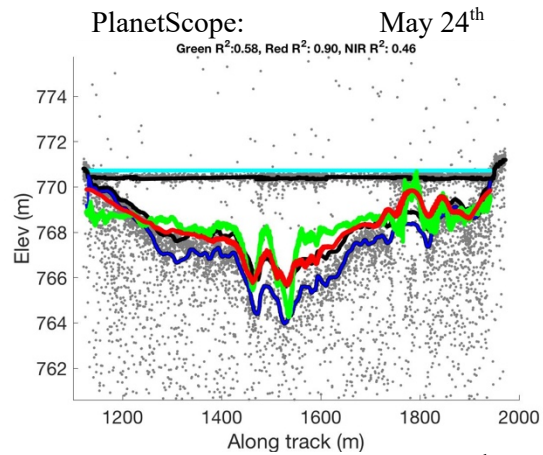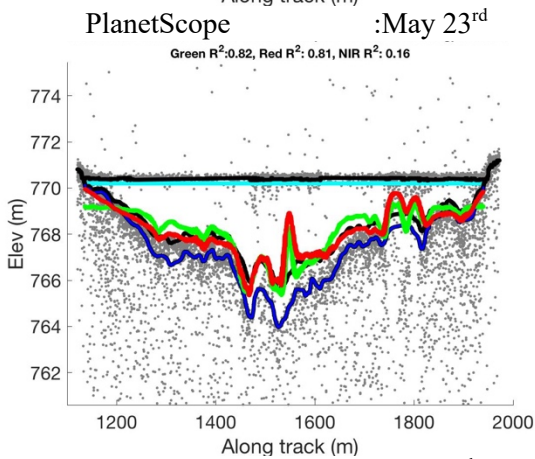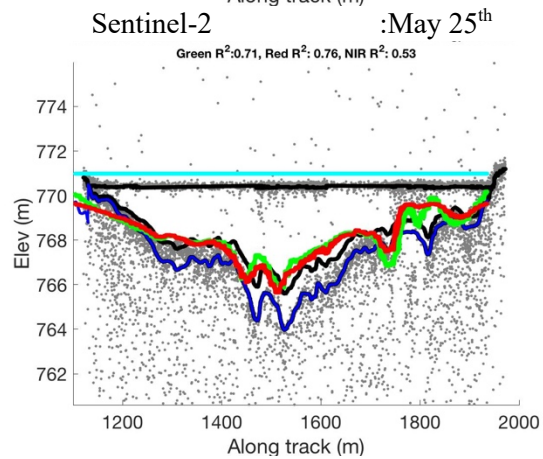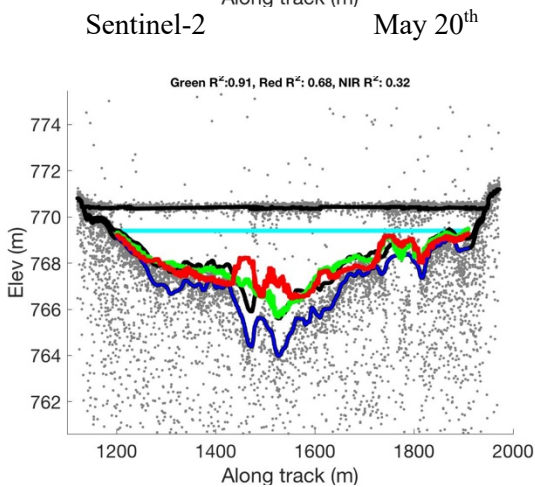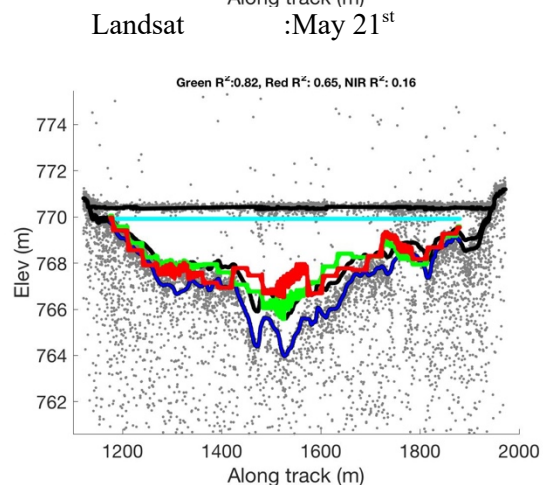

Lake 3:

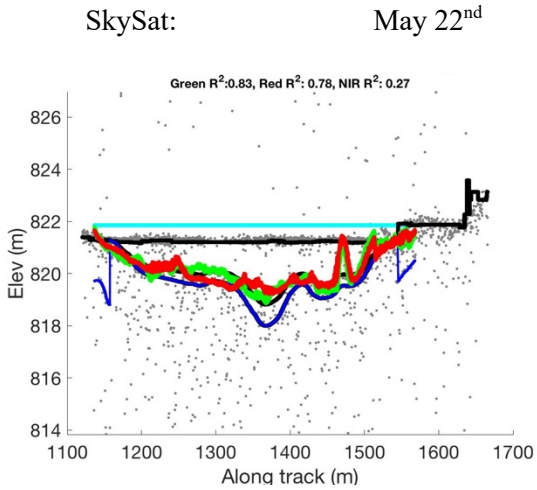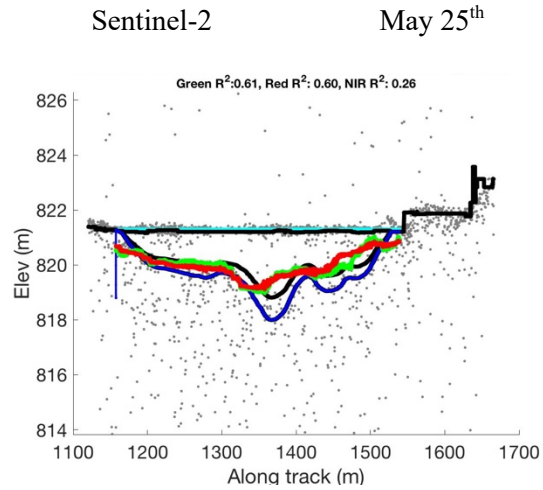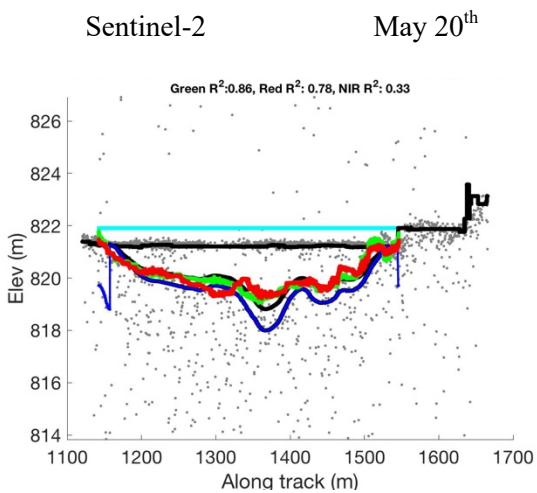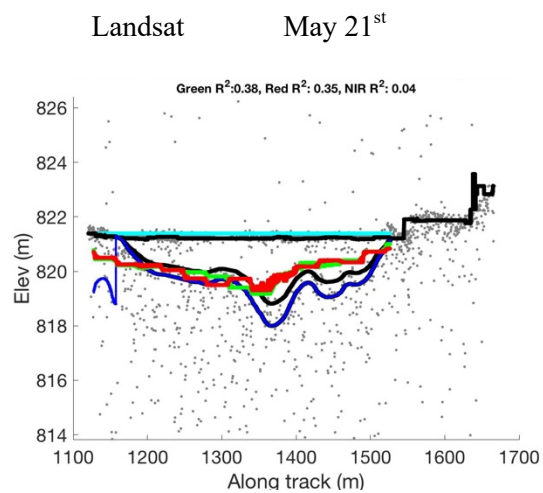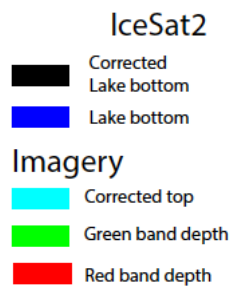



Lake 4:

SkySat May 22<sup>nd</sup>

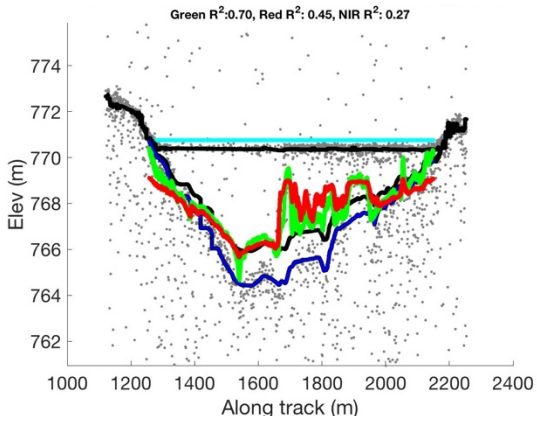

PlanetScope May 24<sup>th</sup>

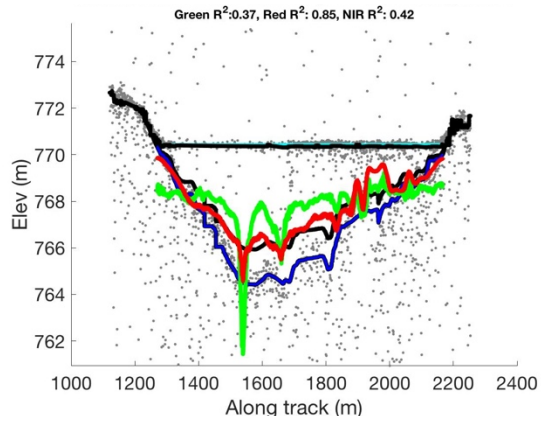

PlanetScope May 23<sup>rd</sup>

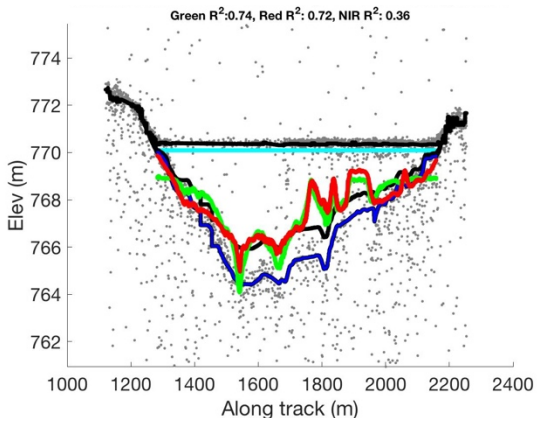

Sentinel-2 May 25<sup>th</sup>

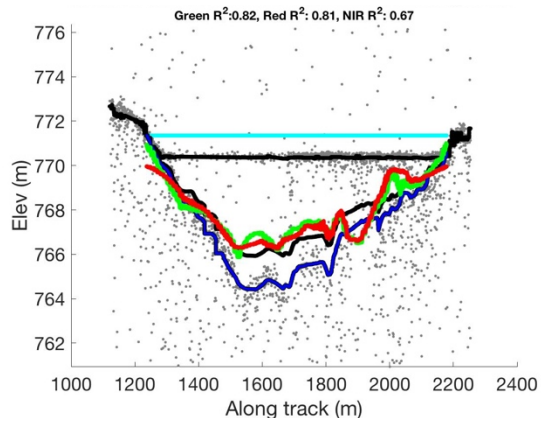

S

Sentinel-2 May 20<sup>th</sup>

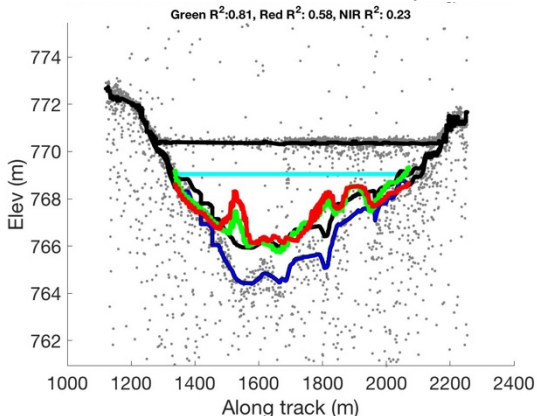

Landsat May 21<sup>st</sup>

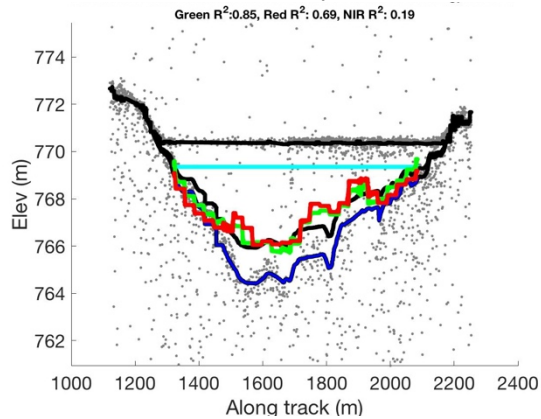

Lake 5:

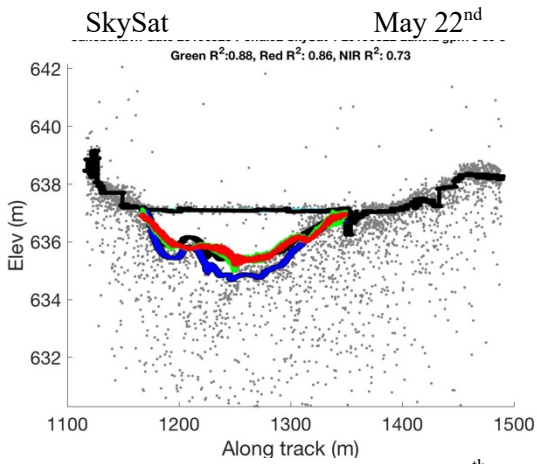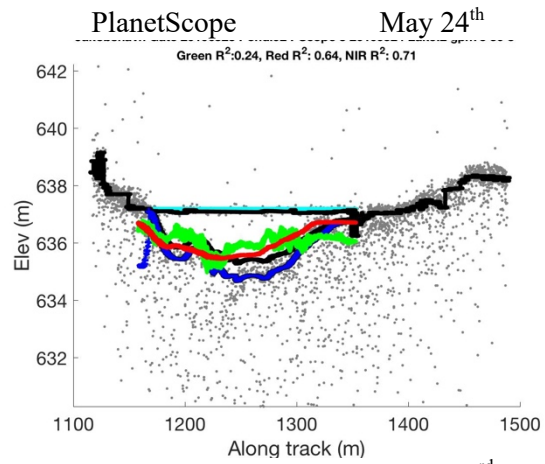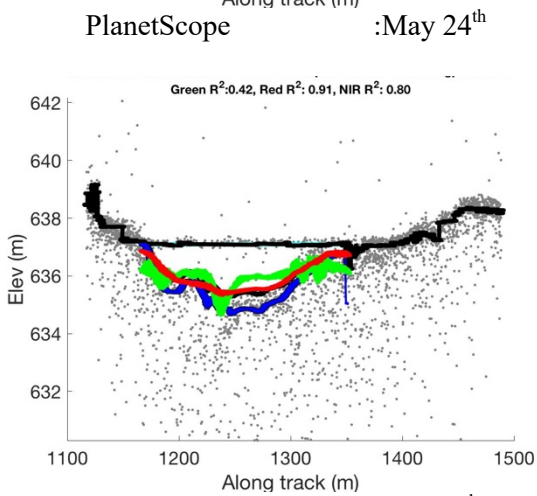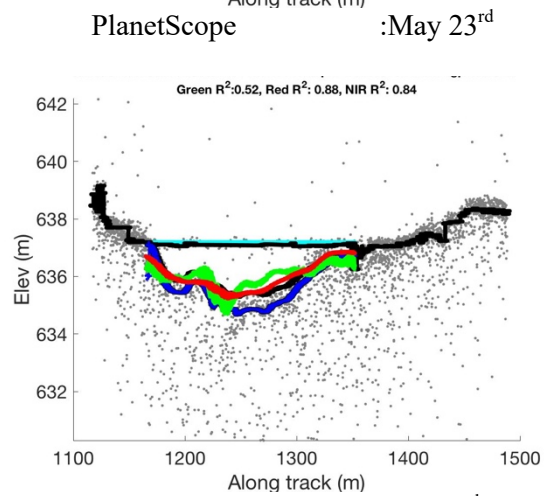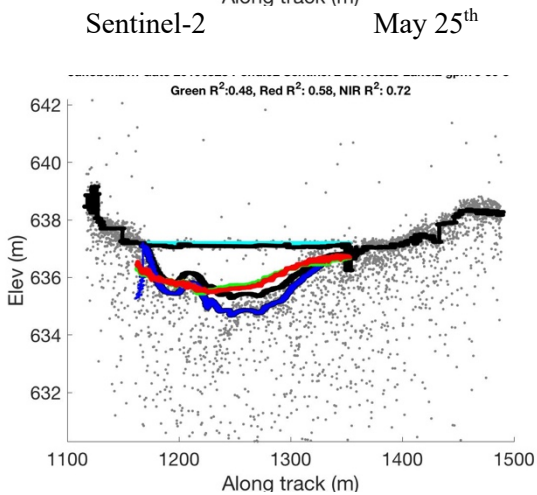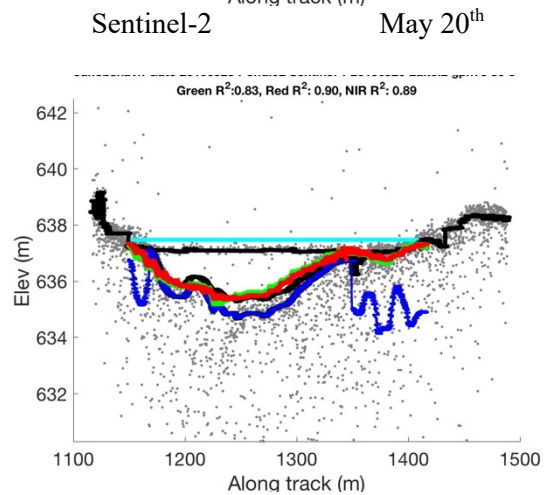

Lake 5 cont...

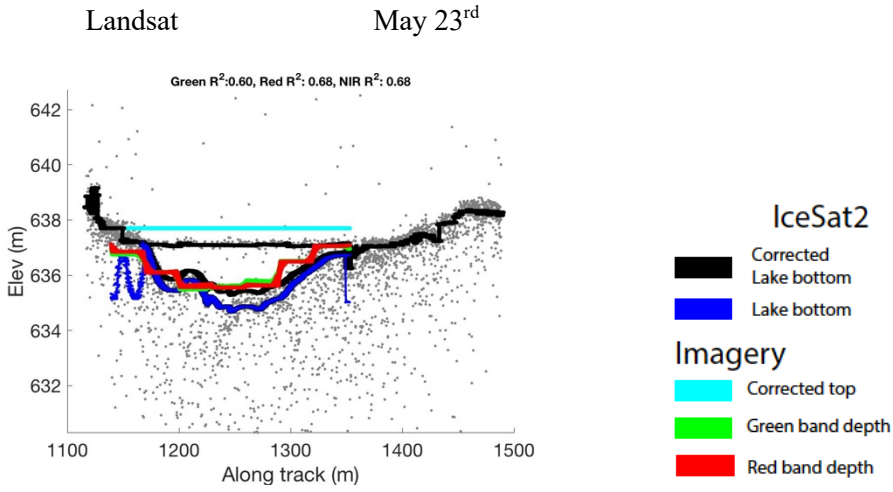

Lake 1

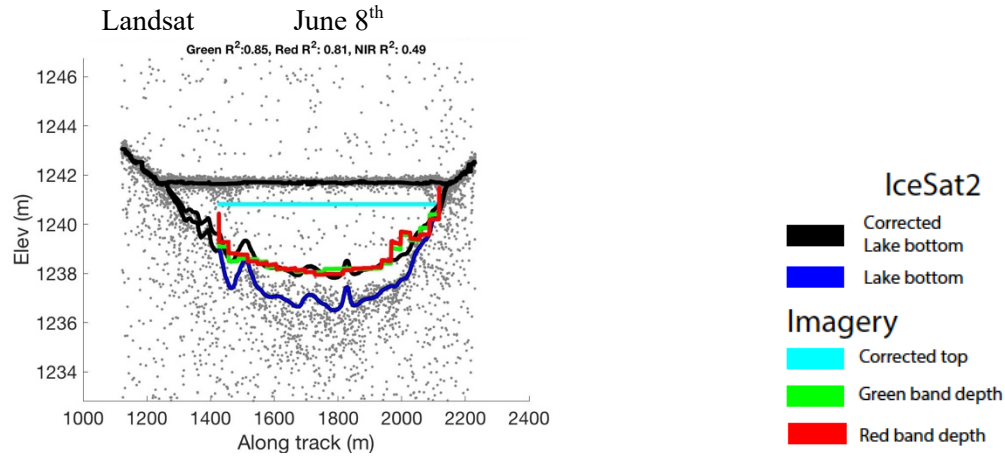

Lake 2:

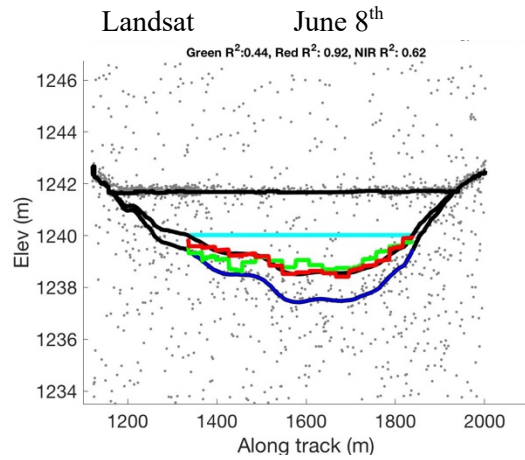

Lake 3:

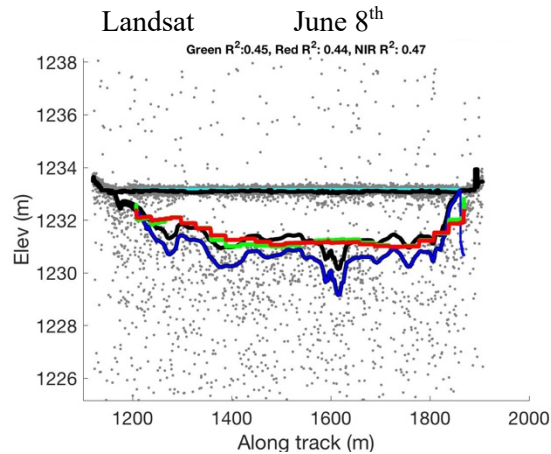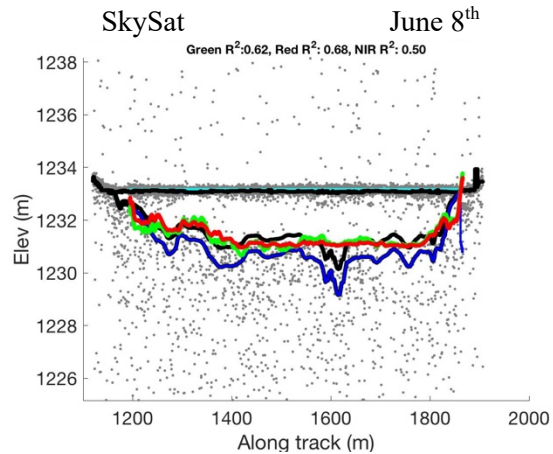

Lake 4

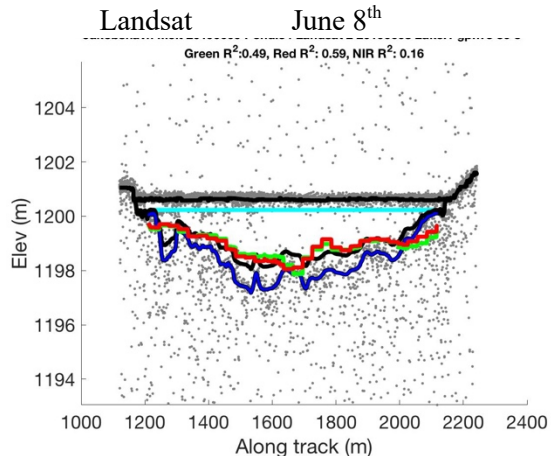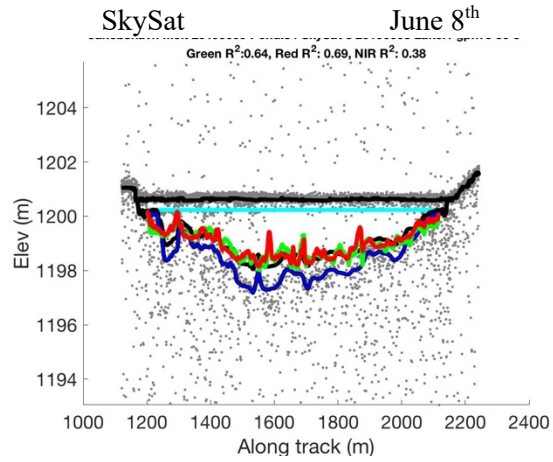

Lake 5

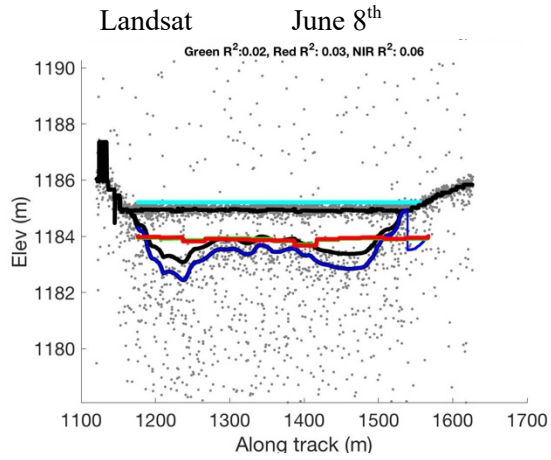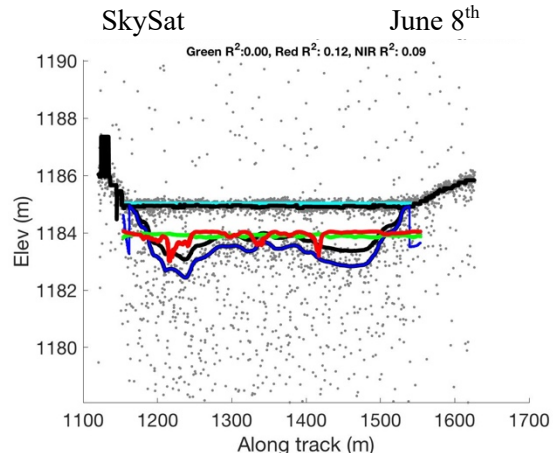

Lake 6

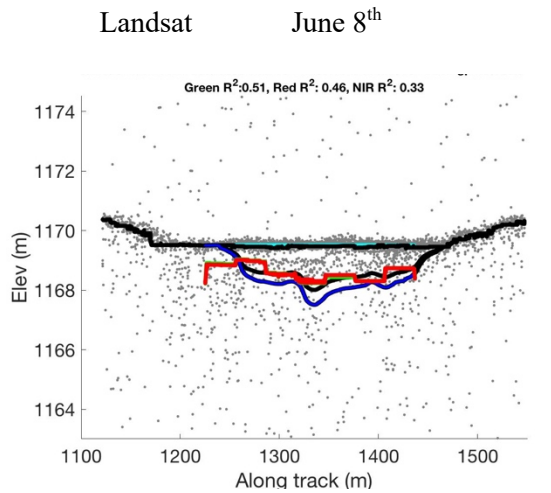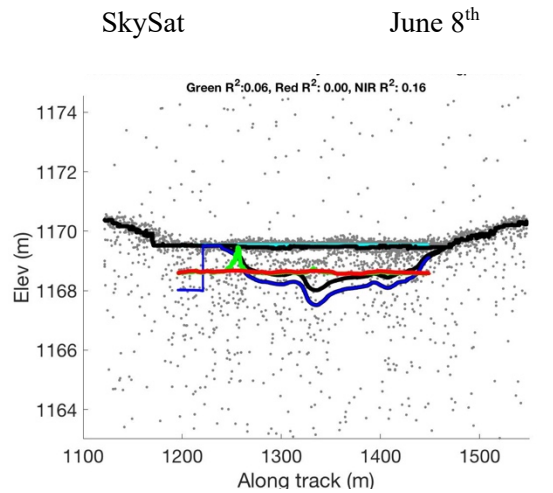

Lake 7

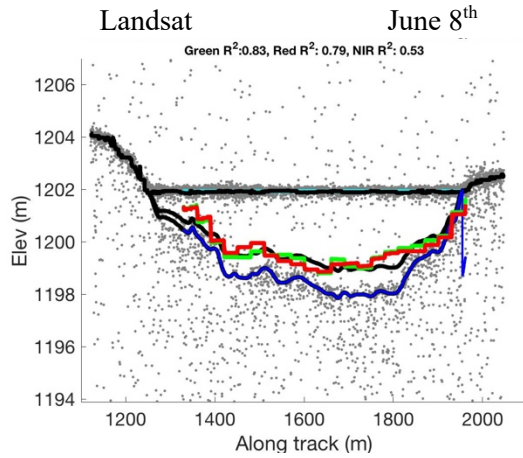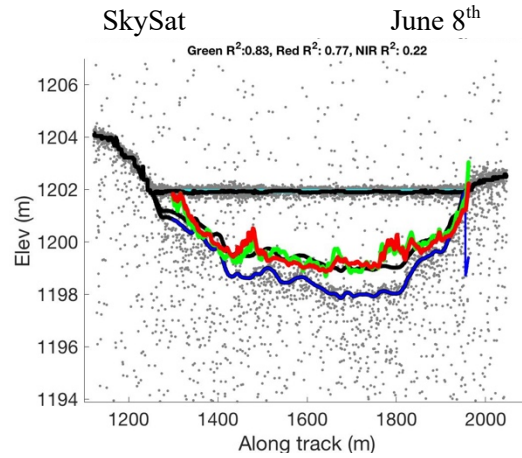

Lake 8

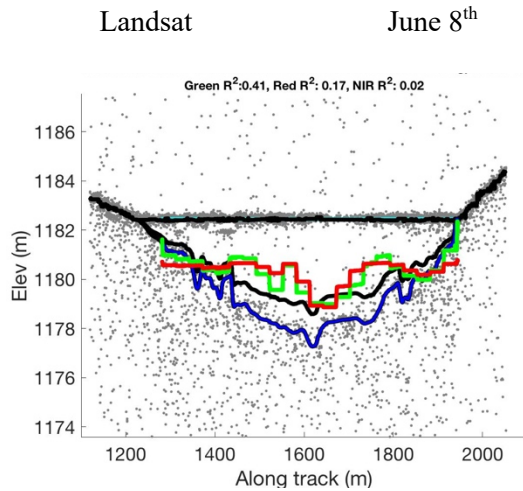

Lake 9

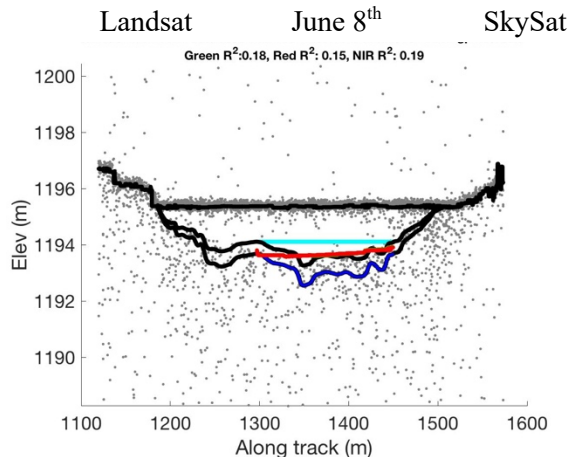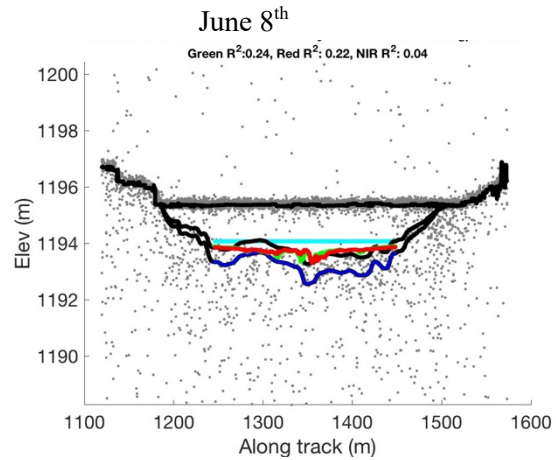

Lake 10

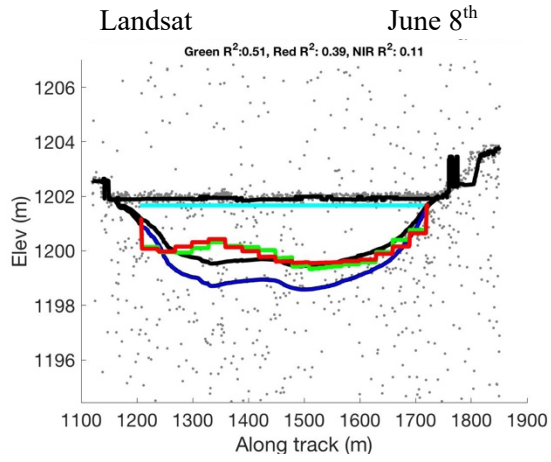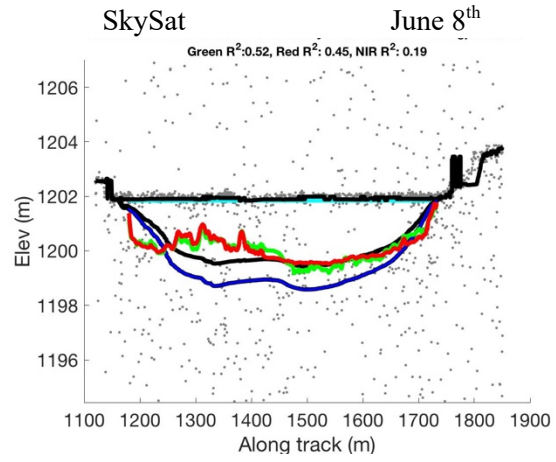

Lake 11

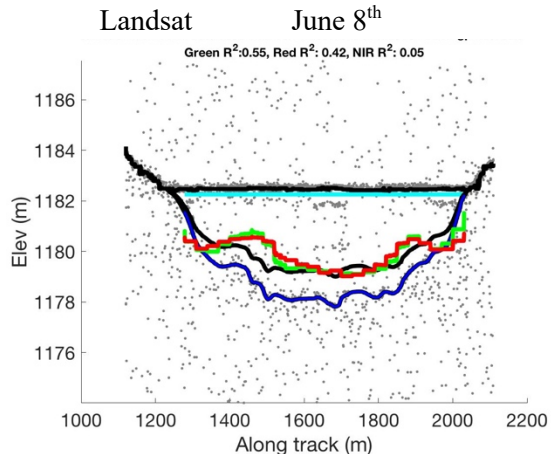

Lake 1

Landsat

June 8<sup>th</sup>

Sentinel-2

June 16<sup>th</sup>

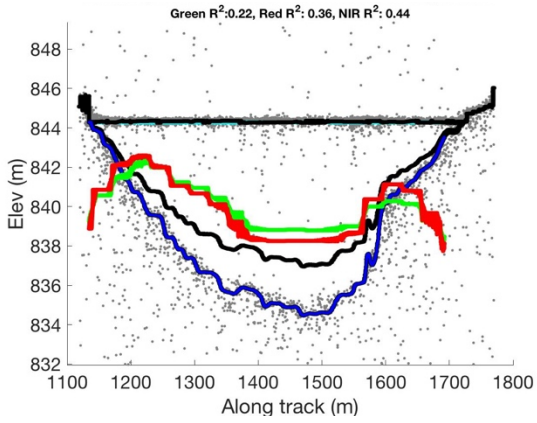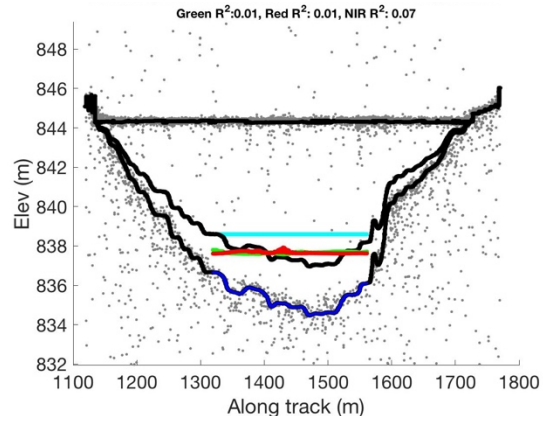

Lake 2

Sentinel-2

June 16<sup>th</sup>

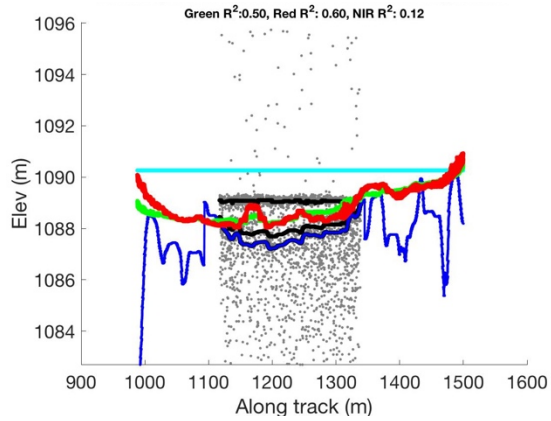



Lake 3

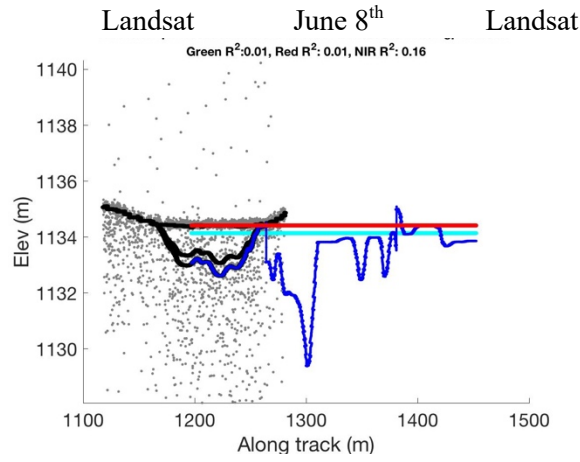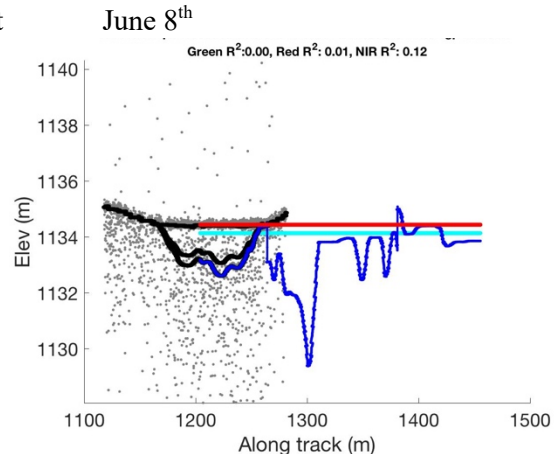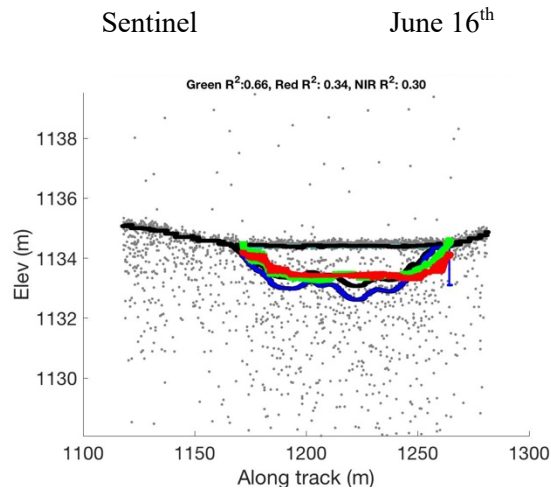

Lake 4

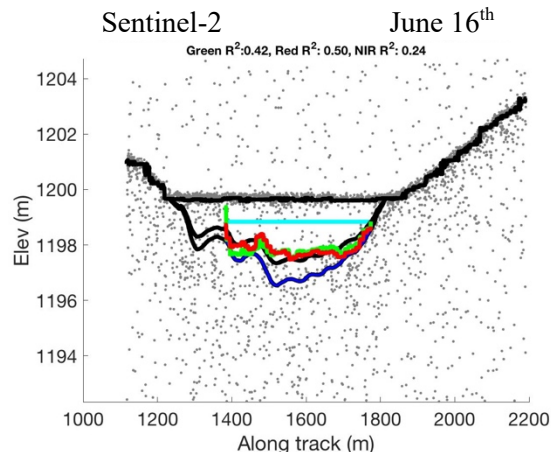

Lake 5

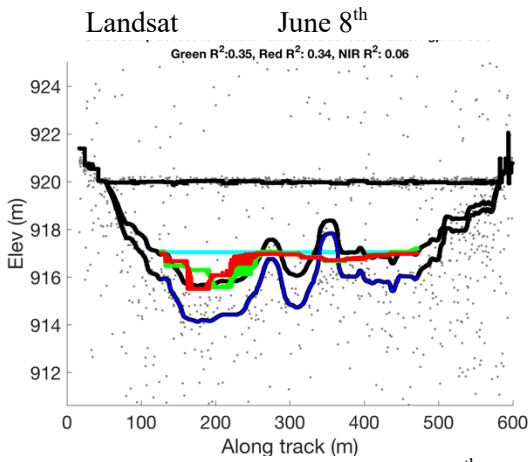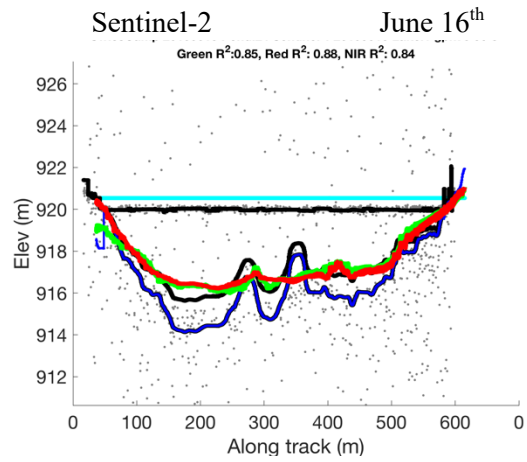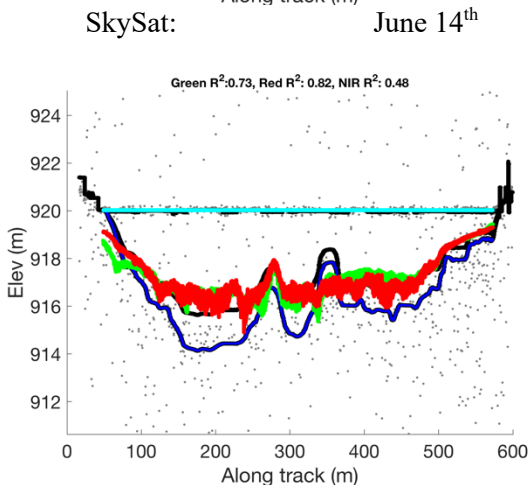

Lake 6

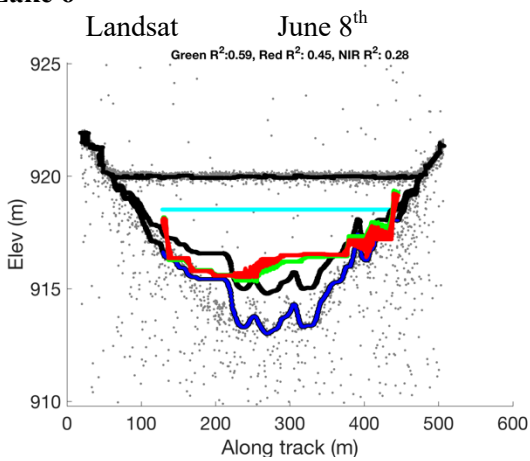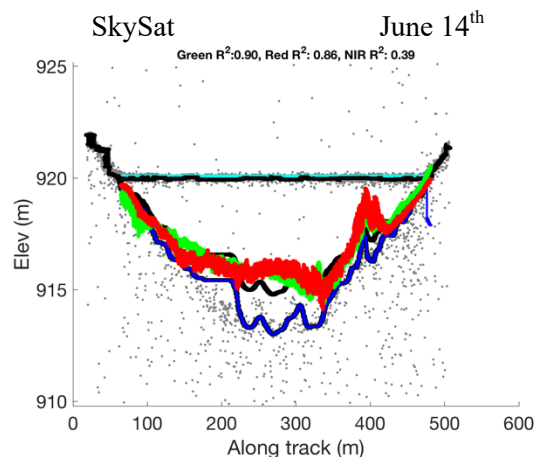

Lake 6 cont...

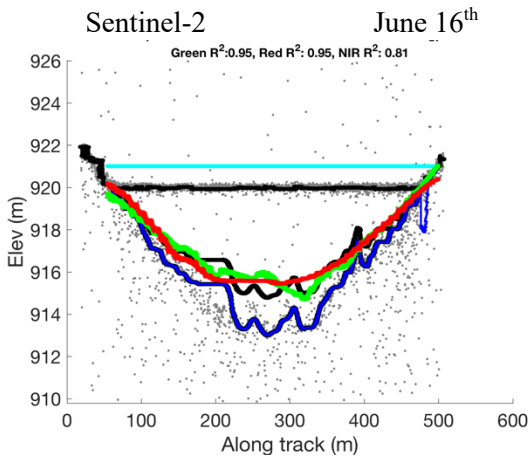

Lake 7

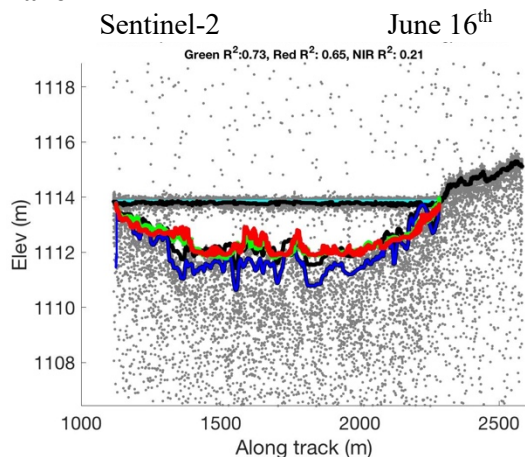

Lake 8

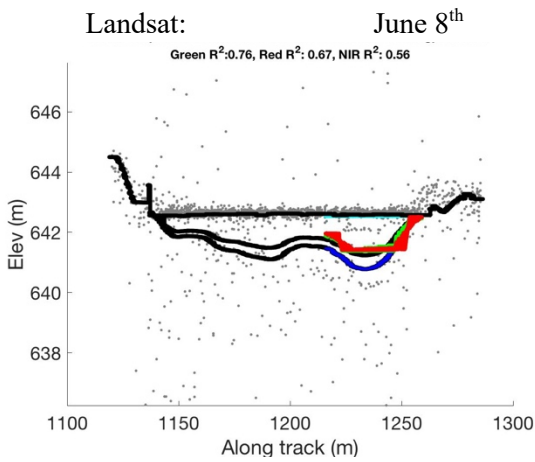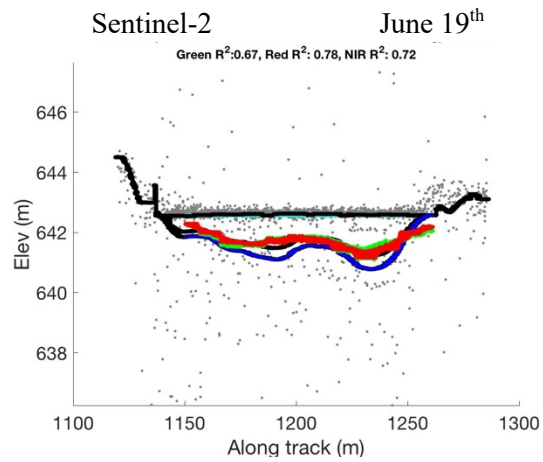

Lake 9

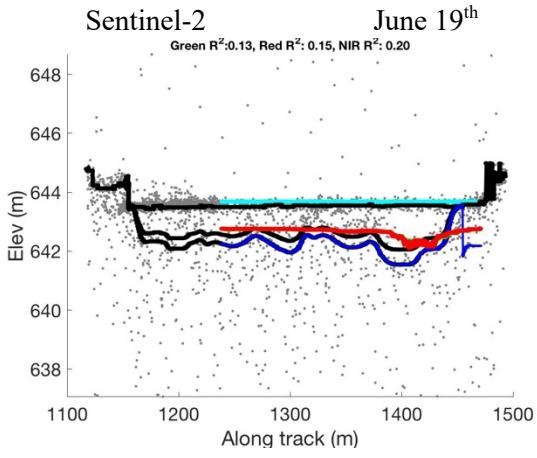

**Lake 1**

Landsat June 17<sup>th</sup>

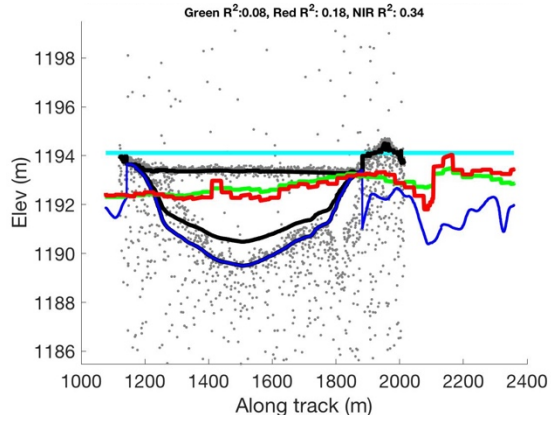

**Lake 2**

Landsat June 17<sup>th</sup>

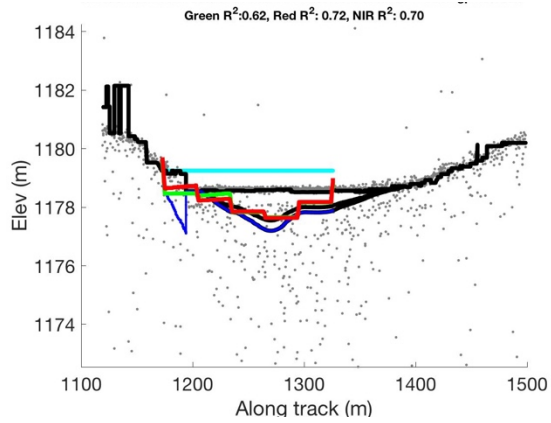

**Lake 3**

Landsat June 17<sup>th</sup>

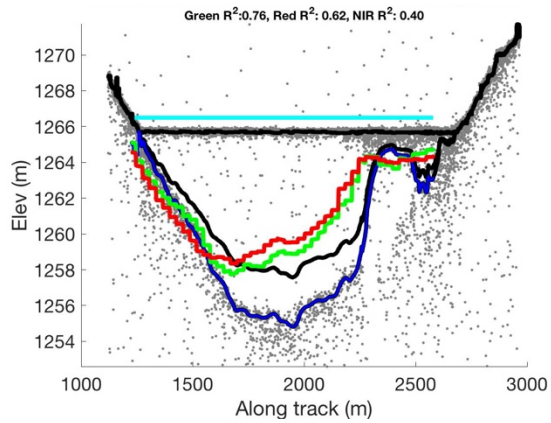

Lake 4

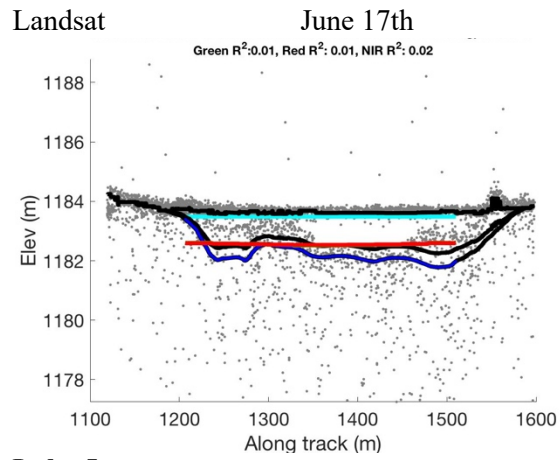

Lake 5:

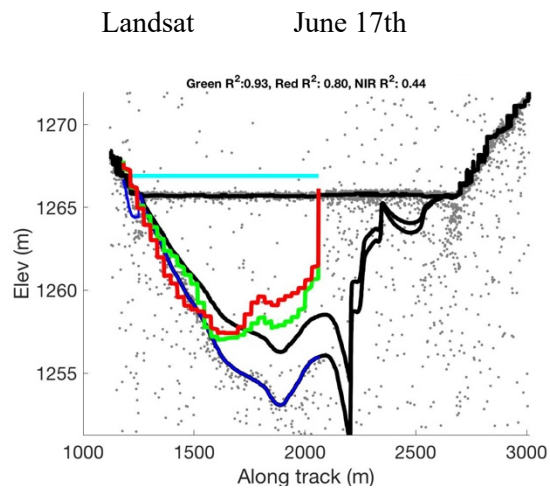

Lake 6

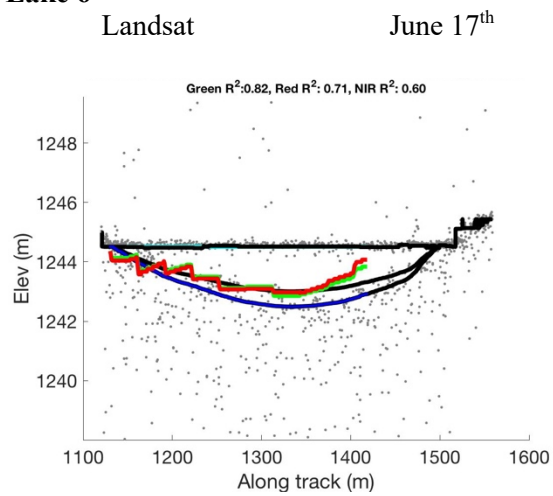

SkySat

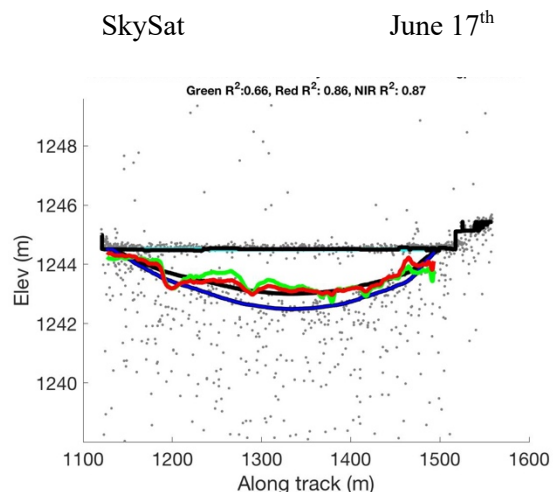

Lake 7:

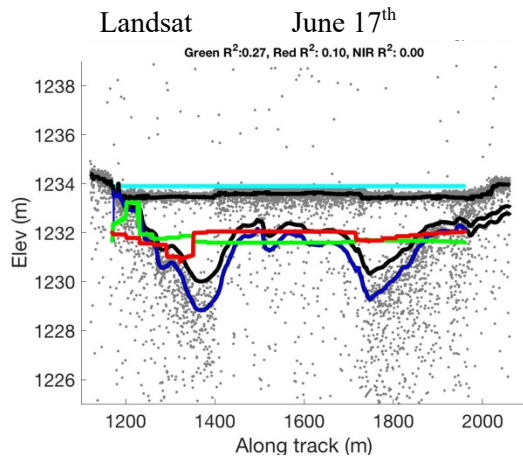

Lake 8:

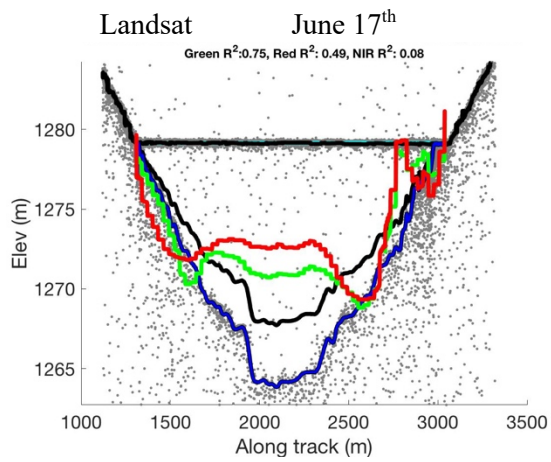

Lake 9:

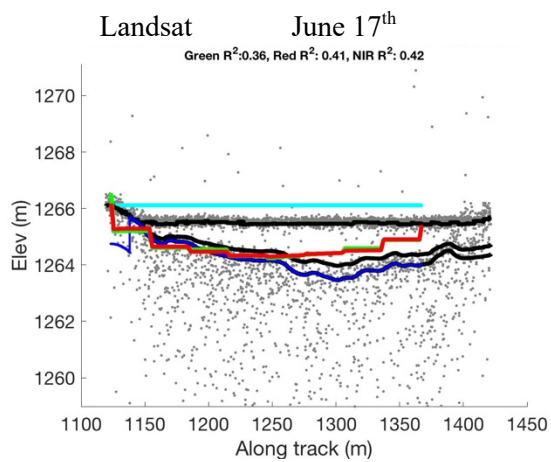

Lake 10

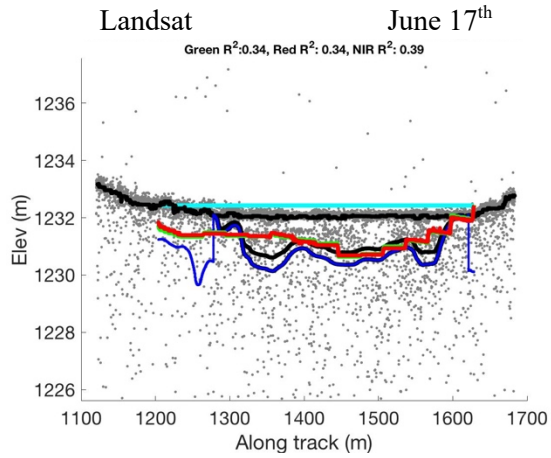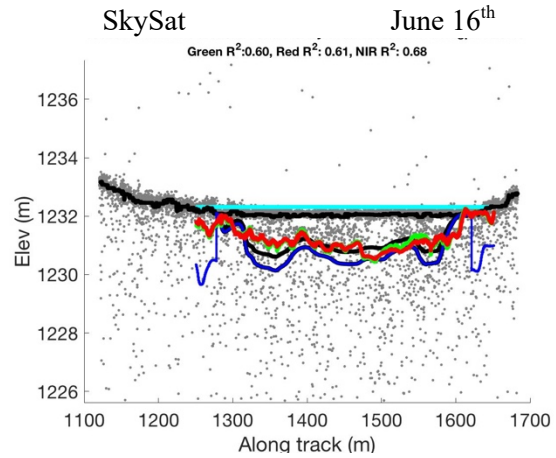

Lake 11

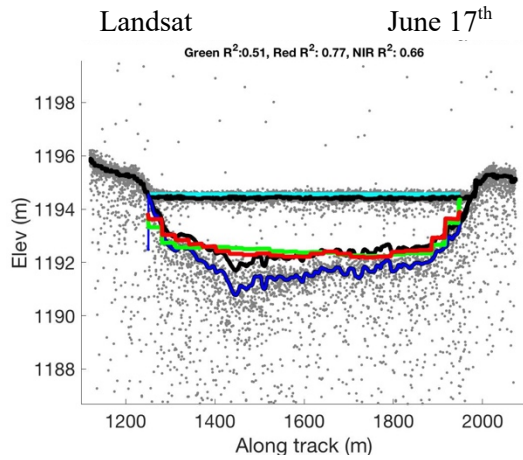

Lake 12

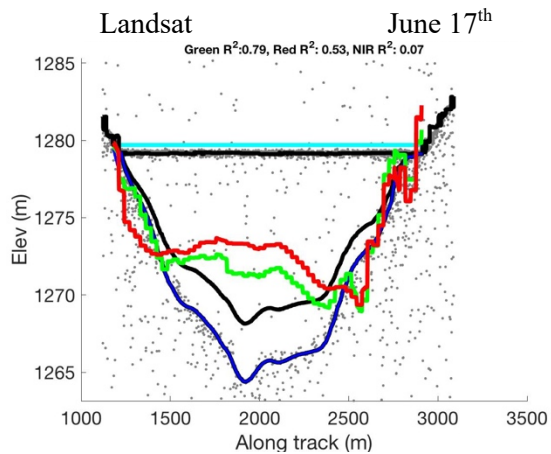



Lake 13

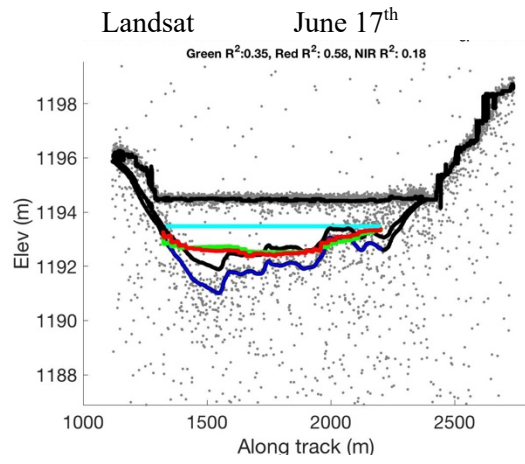

Lake 14

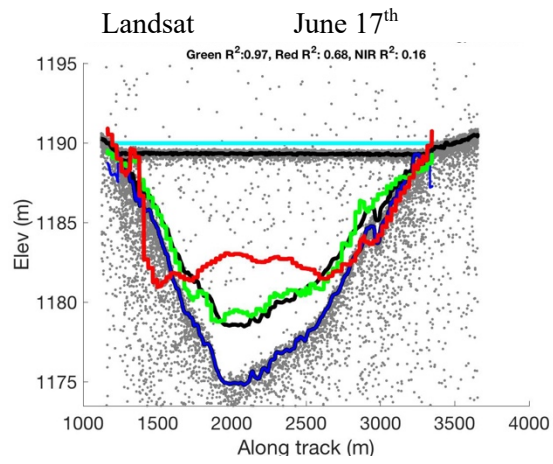

Lake 15

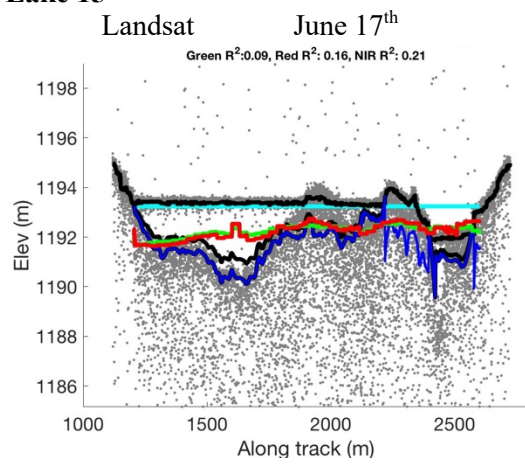

Lake 16

Landsat June 17<sup>th</sup>

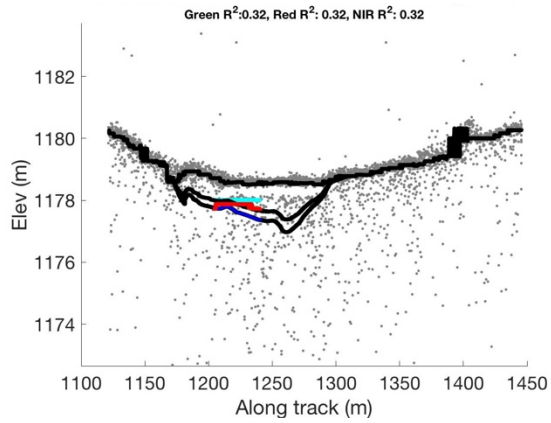

Lake 17

Landsat June 17<sup>th</sup>

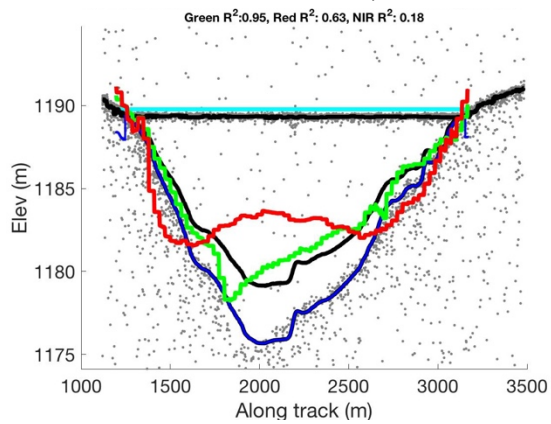

Lake 18

Sentinel-2 June 16<sup>th</sup>

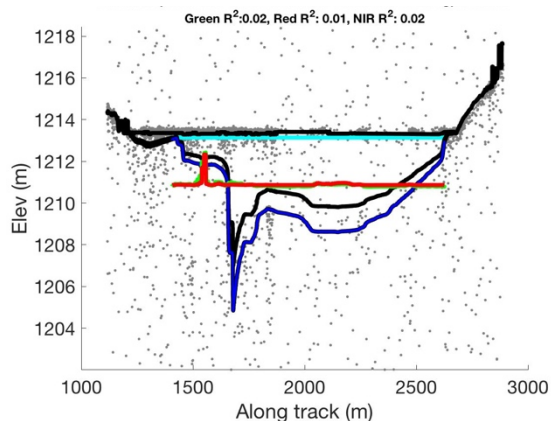

## Lake 19

Sentinel-2

June 16<sup>th</sup>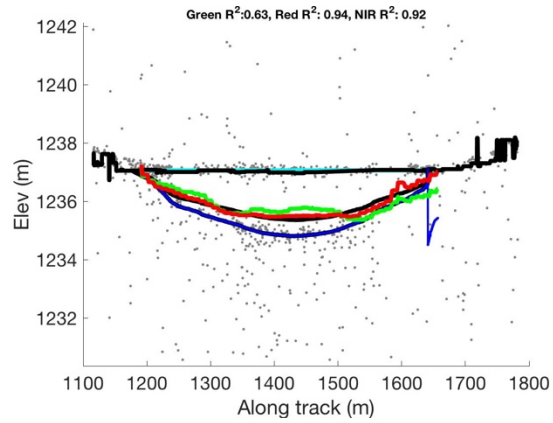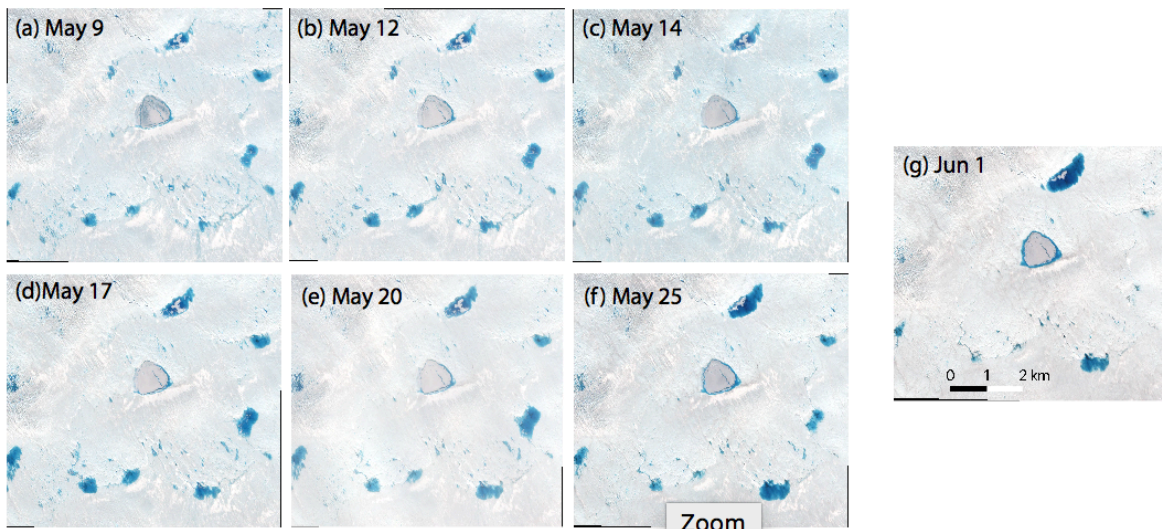

Figure S4: Lake evolution throughout the season in region of Western Greenland (see Fig. 1 in main) from Sentinel-2 imagery. Surface water extent (where  $NDWI_{ice} > 0.2$ ) remains consistent at 3%

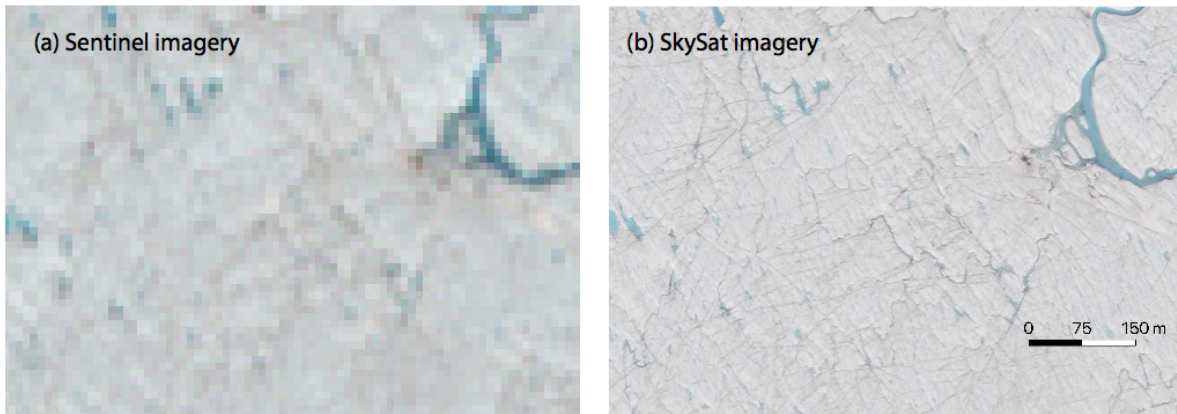

*Figure S5: Higher resolution imagery capturing small-scale stream features on June 1<sup>st</sup> in Western Greenland. (a): Sentinel-2 imagery (10m) (b): SkySat imagery*
